# Supplementary material
Source: HighWire-hosted journal article supplement (https://www.cmajopen.ca/highwire/filestream/88330/field_highwire_adjunct_files/3/open-2021-0135-srqr-checklist.pdf)
Supplement: open-2021-0135-srqr-checklist.pdf [file open-2021-0135-srqr-checklist.pdf]

## Reporting Guideline Checklist

**Title:** A qualitative analysis of physicians' perspectives on university student mental health transfers in Ontario, Canada

**Authors:** Andrea Chittle, MD, CCFP, Shane Neilson, MD, Gina Nicoll, Juveria Zaheer, MD

**Reporting Guideline Used:** Standards for Reporting Qualitative Research (SPQR)

| No.                | Topic                                        | Manuscript Section, Page Number, Line Number                                                                                                                                                                                                                                                                 |
|--------------------|----------------------------------------------|--------------------------------------------------------------------------------------------------------------------------------------------------------------------------------------------------------------------------------------------------------------------------------------------------------------|
| Title and abstract |                                              |                                                                                                                                                                                                                                                                                                              |
| S1                 | Title                                        | Title page (not numbered; no line number)                                                                                                                                                                                                                                                                    |
| S2                 | Abstract                                     | Abstract, page 1, lines 3 – 28                                                                                                                                                                                                                                                                               |
| Introduction       |                                              |                                                                                                                                                                                                                                                                                                              |
| S3                 | Problem formulation                          | Introduction, page 2, lines 33 – 56                                                                                                                                                                                                                                                                          |
| S4                 | Purpose or research question                 | Introduction, page 2, lines 58 – 62                                                                                                                                                                                                                                                                          |
| Methods            |                                              |                                                                                                                                                                                                                                                                                                              |
| S5                 | Qualitative approach and research paradigm   | Methods, Study Design, page 2, lines 69 - 78                                                                                                                                                                                                                                                                 |
| S6                 | Researcher characteristics and reflexivity   | Author statements, title page (not numbered; no line numbers)<br>Methods, page 3, lines 92 - 105                                                                                                                                                                                                             |
| S7                 | Context                                      | Methods, Study Sampling, page 3, lines 108 – 113                                                                                                                                                                                                                                                             |
| S8                 | Sampling Strategy                            | Methods, Study Sampling, page 3, lines 116 – 121                                                                                                                                                                                                                                                             |
| S9                 | Ethical issues pertaining to human subjects  | Methods, Study Sampling, page 3, lines 128 – 129<br>Methods, Data Collection, page 3, lines 163 - 164<br>Methods, Ethics, page 5, line 203                                                                                                                                                                   |
| S10                | Data collection methods                      | Methods, Study Design, page 2, lines 68 – 69<br>Methods, Study Design, page 3, lines 81 – 83<br>Methods, Study Design, page 3, lines 86 - 89<br>Methods, Study Sampling, page 3, lines 108 – 126<br>Methods, Data Collection, page 4, lines 133 - 172<br>Methods, Data Analysis, page 4 – 5, lines 176 - 193 |
| S11                | Data collection instruments and technologies | Methods, Data Collection, page 4, lines 133 – 172<br>Appendix, Interview Guide, pages 16 – 20                                                                                                                                                                                                                |
| S12                | Units of study                               | Methods, Study Sampling, page 3, line 108, lines 111-126<br>Results, page 5, lines 207-219<br>Table 1, page 9, line 346                                                                                                                                                                                      |
| S13                | Data processing                              | Methods, Data Collection, page 3, lines 133 – 172                                                                                                                                                                                                                                                            |
| S15                | Data analysis                                | Methods, Study Design, pages 2 – 3, lines 69 – 89<br>Methods, Data Analysis, pages 4 – 5, lines 176 - 193                                                                                                                                                                                                    |
| S15                | Techniques to enhance trustworthiness        | Methods, Data Collection, page 4, lines 162-163                                                                                                                                                                                                                                                              |

|                   |                                                                                              |                                                                                                              |
|-------------------|----------------------------------------------------------------------------------------------|--------------------------------------------------------------------------------------------------------------|
|                   |                                                                                              | Methods, Data Analysis, pages 4 – 5, lines 179 - 189                                                         |
| Results/ Findings |                                                                                              |                                                                                                              |
| S16               | Synthesis and interpretation                                                                 | Results, page 5 - 7, lines 207 - 279<br>Interpretation, page 6, lines 283 - 308                              |
| S17               | Link to empirical data                                                                       | Results, pages 5 – 7, lines 207 – 279<br>Table 2, page 9<br>Table 3, pages 10 – 12<br>Table 4, pages 12 – 13 |
| Discussion        |                                                                                              |                                                                                                              |
| S18               | Integration with prior work, implications, transferability, and contribution(s) to the field | Conclusion, pages 7 – 8, lines 312 - 330                                                                     |
| S19               | Limitations                                                                                  | Limitations, page 8, lines 334 - 343                                                                         |
| Other             |                                                                                              |                                                                                                              |
| S20               | Conflicts of Interest                                                                        | Title page (not numbered; no line number)                                                                    |
| S21               | Funding                                                                                      | Title page (not numbered; no line number)                                                                    |
